# Supplementary material for: Co-generation of palladium nanoparticles and phosphate supported on metal–organic frameworks as hydrogenation catalysts
Source: Royal Society of Chemistry journal article supplement (doi:10.1039/d2dt04109j), 2023-01-01
Supplement: d2dt04109j1.pdf [file d2dt04109j1.pdf]

SUPPLEMENTARY INFORMATION

**Co-generation of palladium nanoparticle and phosphate inside a metal-organic framework for hydrogenation catalyst**

Yohei Takashima,\* Seiko Tetsusashi, Mai Takano, Shintaro Tanaka, Yui Murakami, Takaaki Tsuruoka and Kensuke Akamatsu\*

*Department of Nanobiochemistry, Frontiers of Innovative Research in Science and Technology (FIRST), Konan University,  
7-1-20 Minatojimaminamimachi, Chuo-ku, Kobe 650-0047, Japan*

E-mail: [takashim@konan-u.ac.jp](mailto:takashim@konan-u.ac.jp)

Supporting data

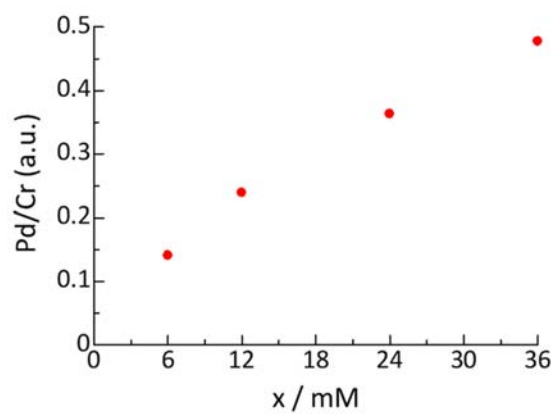

**Figure S1.** Pd/Cr atomic ratios of MOF composites after treating with Pd(OAc)<sub>2</sub> solution (in acetone) with different concentrations.

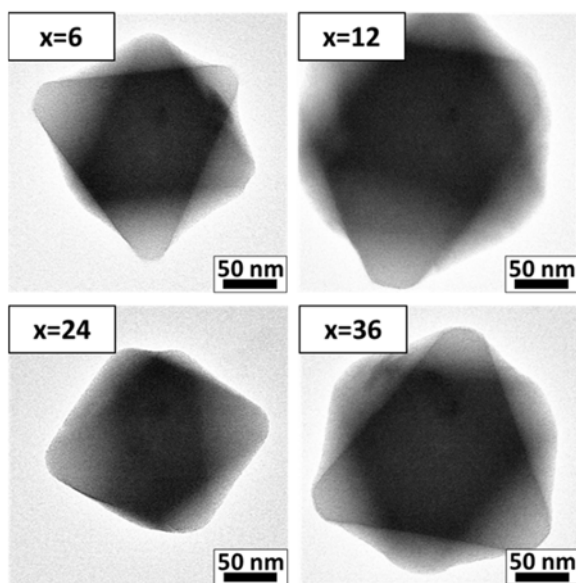

**Figure S2.** TEM images of MOF composites after treating with the acetone solution of Pd(OAc)<sub>2</sub> with different concentrations (x mM).

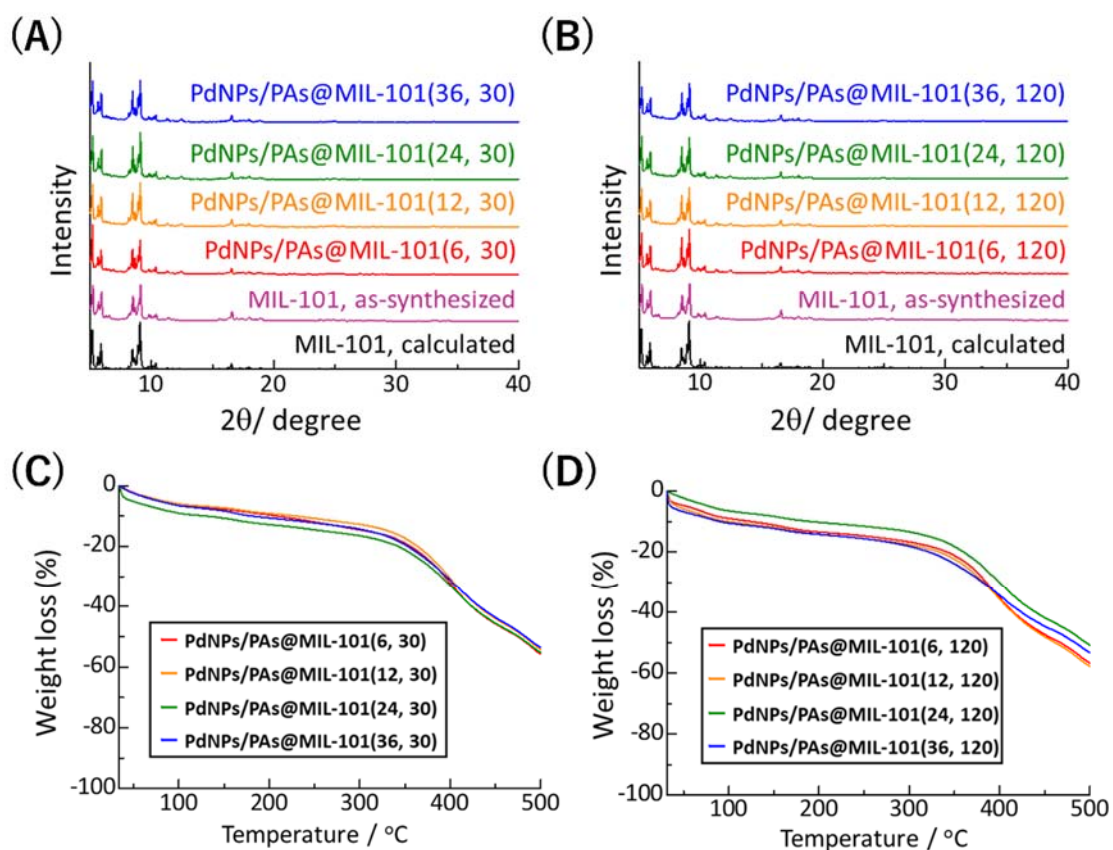

**Figure S3.** XRD diffraction data of (A) PdNPs/PAs@MIL-101(x, 30) and (B) PdNPs/PAs@MIL-101(x, 120)(x = 6, 12, 24 and 36). TG profiles of (C) PdNPs/PAs@MIL-101(x, 30) and (D) PdNPs/PAs@MIL-101(x, 120)(x = 6, 12, 24 and 36).

SUPPLEMENTARY INFORMATION

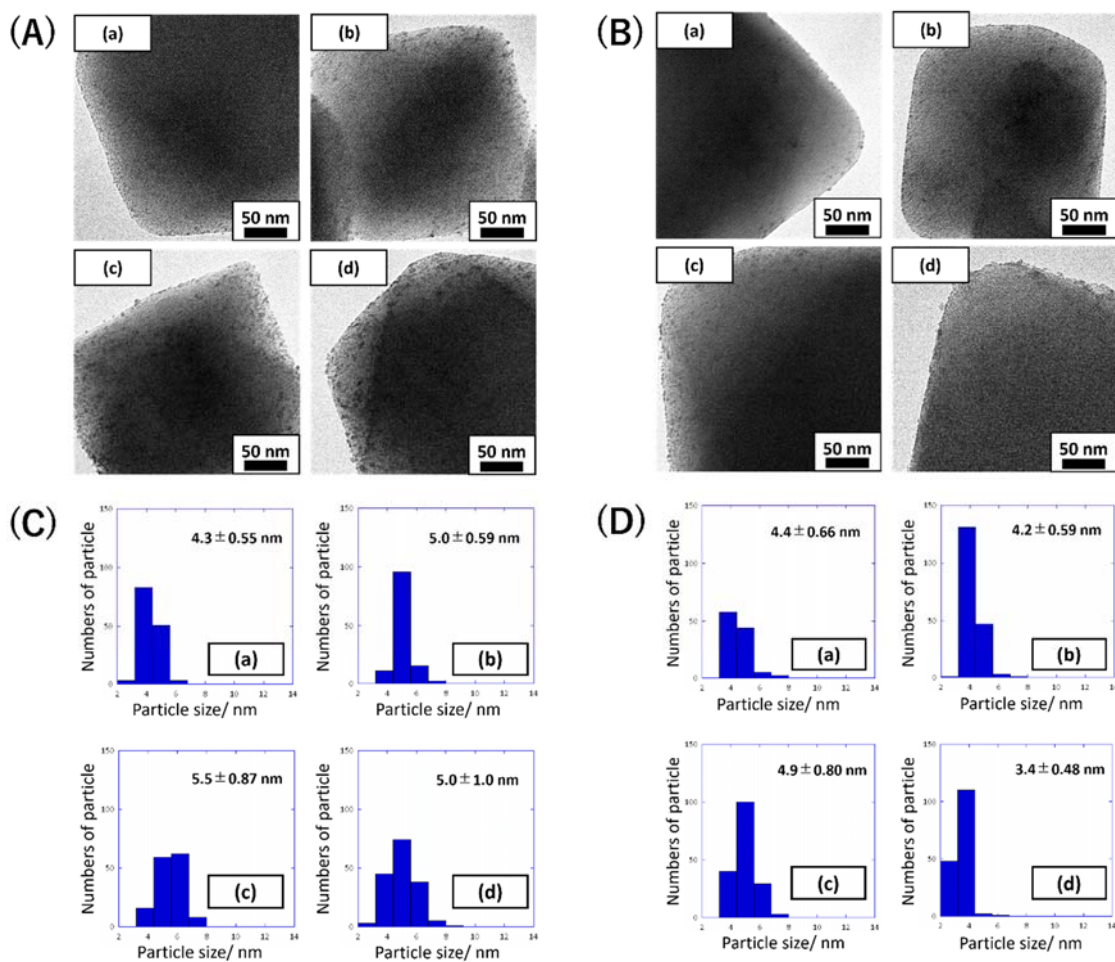

**Figure S4.** TEM images of (A) PdNPs/PAs@MIL-101(x, 30) and (B) PdNPs/PAs@MIL-101(x, 120): (a) x=6, (b) x=12, (c) x=24, (d) x=36. PdNP size distribution diagrams of (C) PdNPs/PAs@MIL-101(x, 30) and (D) PdNPs/PAs@MIL-101(x, 120) : (a) x=6, (b) x=12, (c) x=24, (d) x=36.

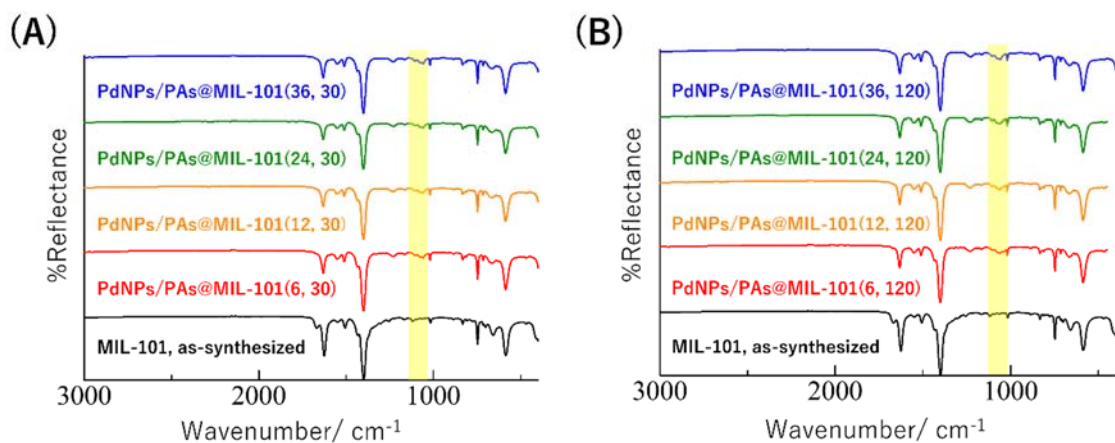

**Figure S5.** IR spectra of (A) PdNPs/PAs@MIL-101(x, 30)(x = 6, 12, 24 and 36) and (B) PdNPs/PAs@MIL-101(x, 120)(x = 6, 12, 24 and 36). The peaks corresponding to P=O stretching vibration were highlighted with yellow.

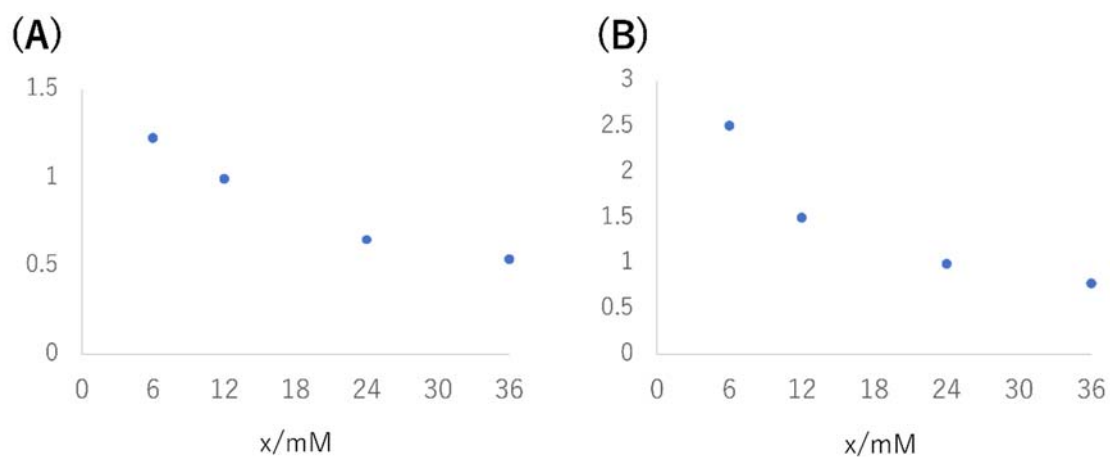

**Figure S6.** Atomic ratio of P/Pd in (A) PdNPs/PAs@MIL-101(x, 30)(x = 6, 12, 24 and 36) and (B) PdNPs/PAs@MIL-101(x, 120)(x = 6, 12, 24 and 36).

SUPPLEMENTARY INFORMATION

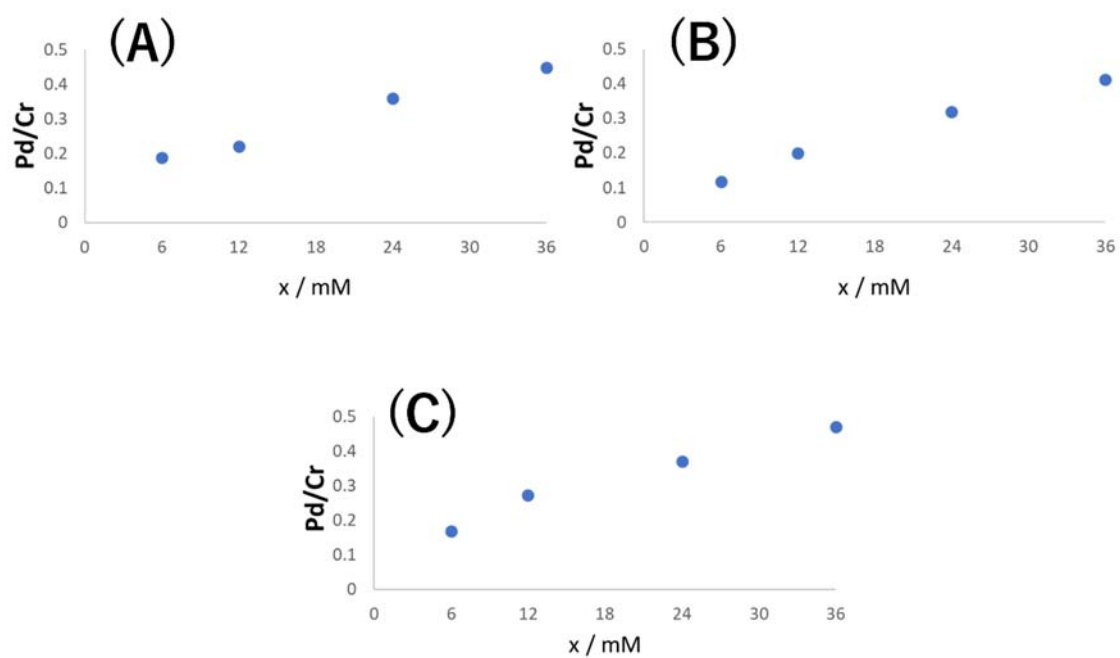

**Figure S7.** Atomic ratio of Pd/Cr in (A) PdNPs/PAs@MIL-101(x, 30)(x = 6, 12, 24 and 36), (B) PdNPs/PAs@MIL-101(x, 120)(x = 6, 12, 24 and 36) and (C) PdNPs/PAs@MIL-101(x, 480)(x = 6, 12, 24 and 36)

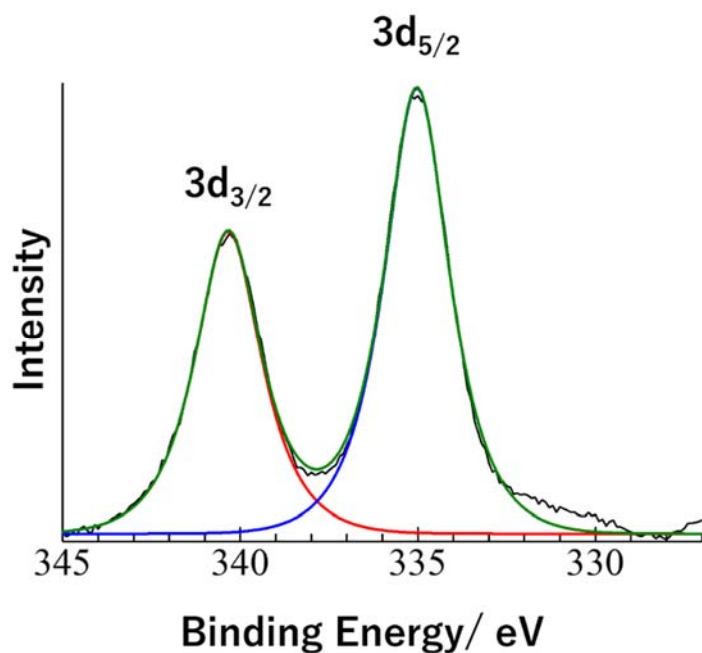

**Figure S8.** Pd 3d peaks in XPS spectra of PdNPs/PAs@MIL-101 (24, 480). Fitted curves to  $3d_{3/2}$ ,  $3d_{5/2}$  and  $3d_{3/2}+3d_{5/2}$  were colored with red, blue and green, respectively.

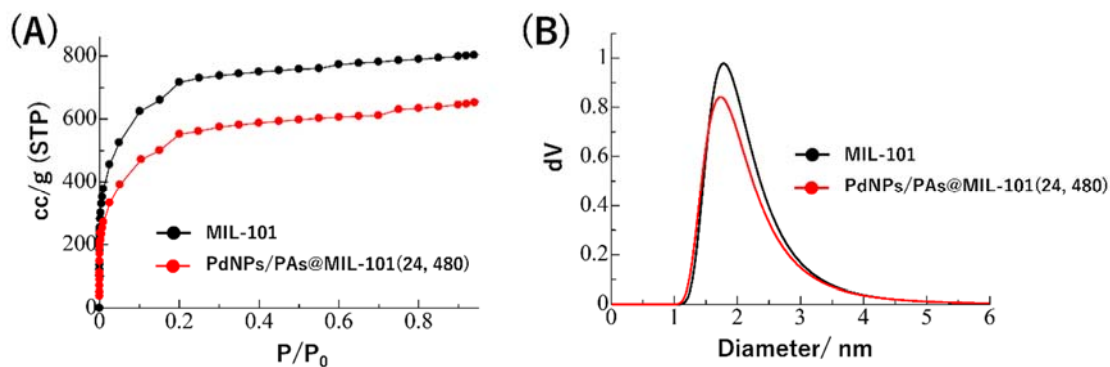

**Figure S9.** (A)  $N_2$  gas adsorption of MIL-101 and PdNPs/PAs@MIL-101(24, 480) at 77 K. BET surface areas for MIL-101 and PdNPs/PAs@MIL-101(24, 480) were  $2082 \text{ m}^2/\text{g}$  and  $1872 \text{ m}^2/\text{g}$ , respectively. (B) Pore size distributions of MIL-101 and PdNPs/PAs@MIL-101(24, 480) based on DA method.

SUPPLEMENTARY INFORMATION

(A)

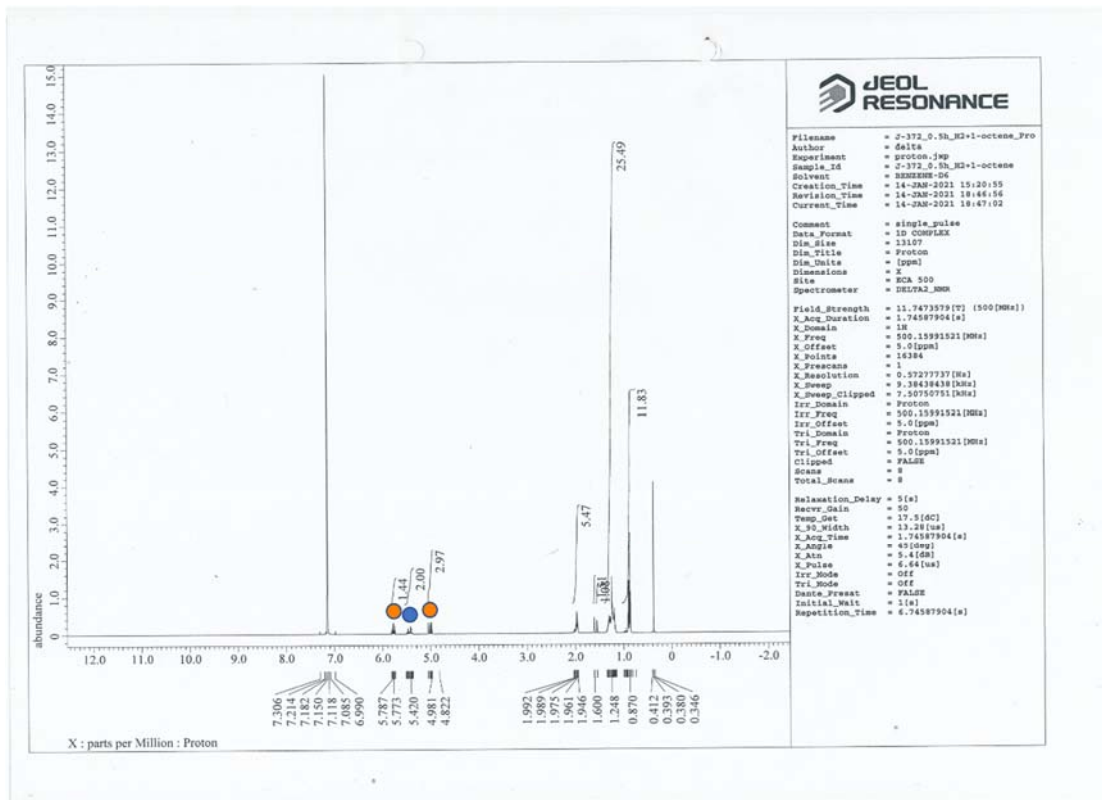

(B)

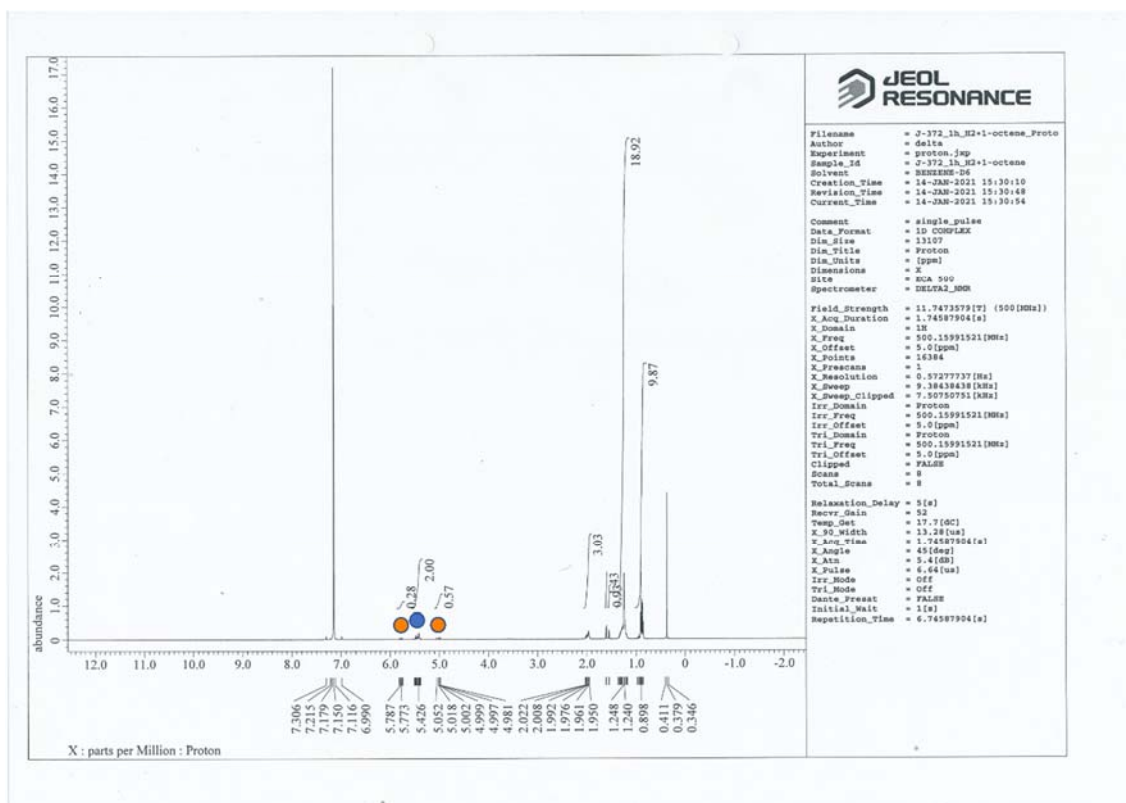



SUPPLEMENTARY INFORMATION

(C)

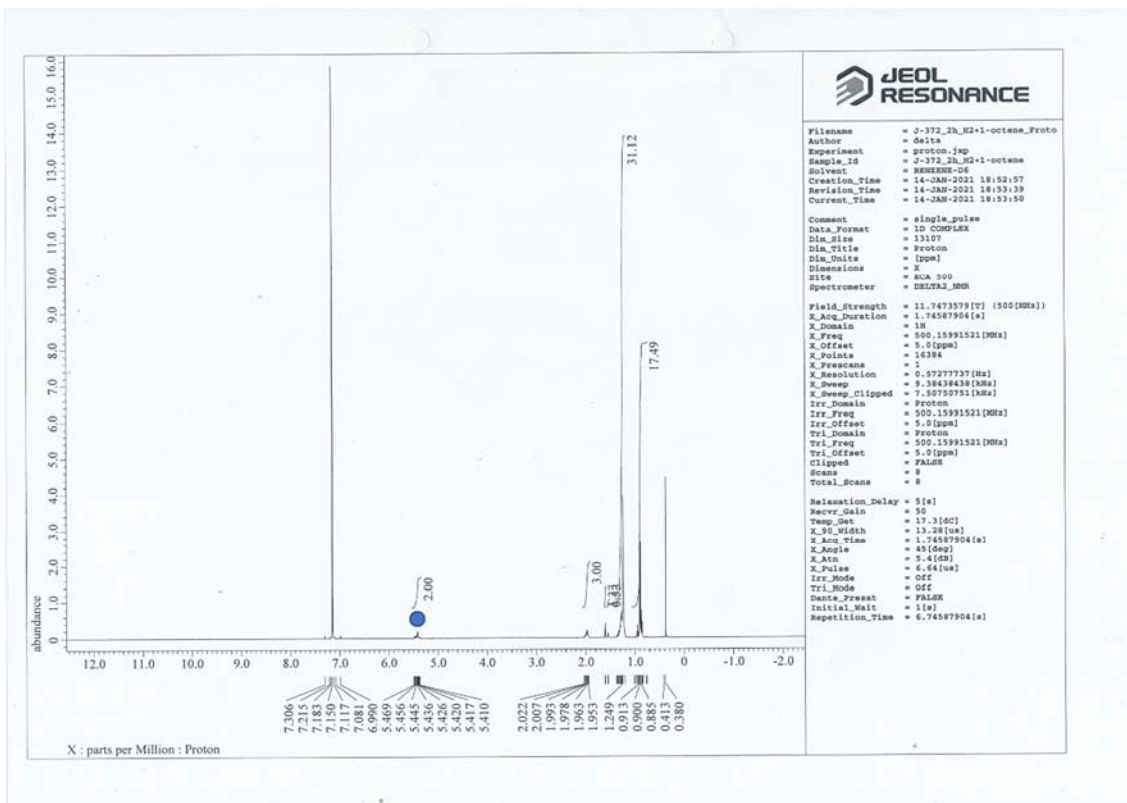

(D)

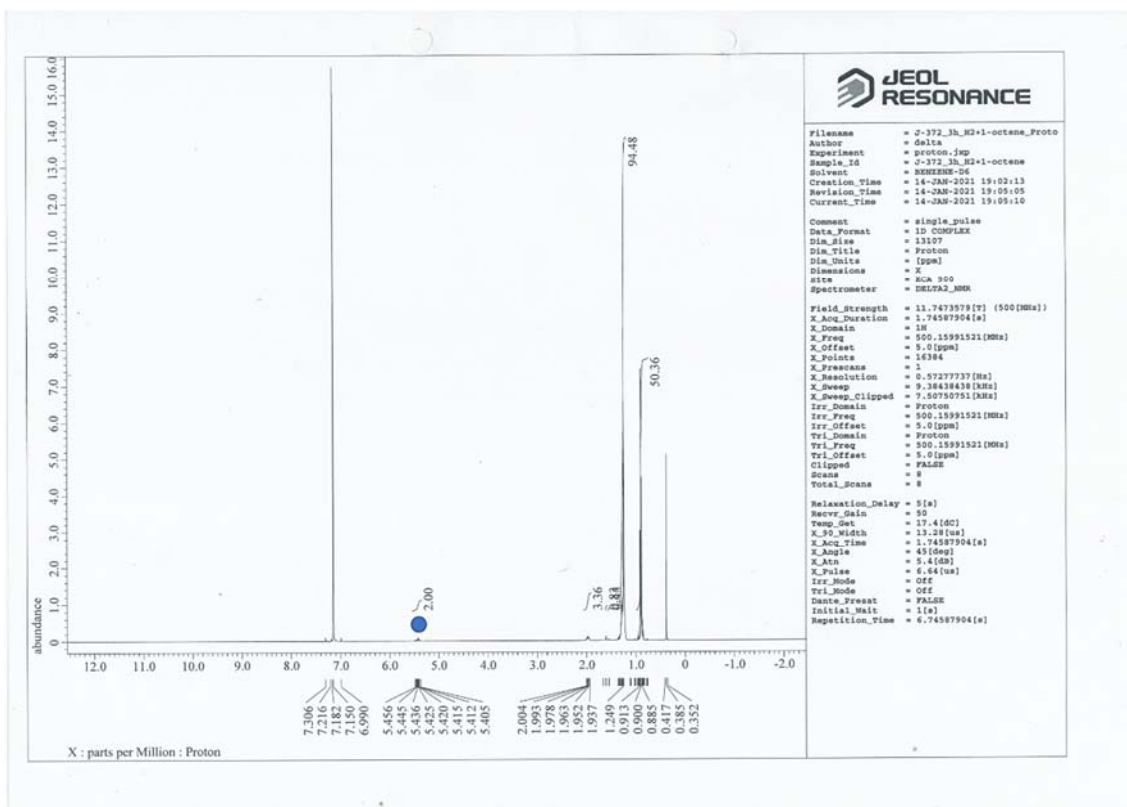

SUPPLEMENTARY INFORMATION

(E)

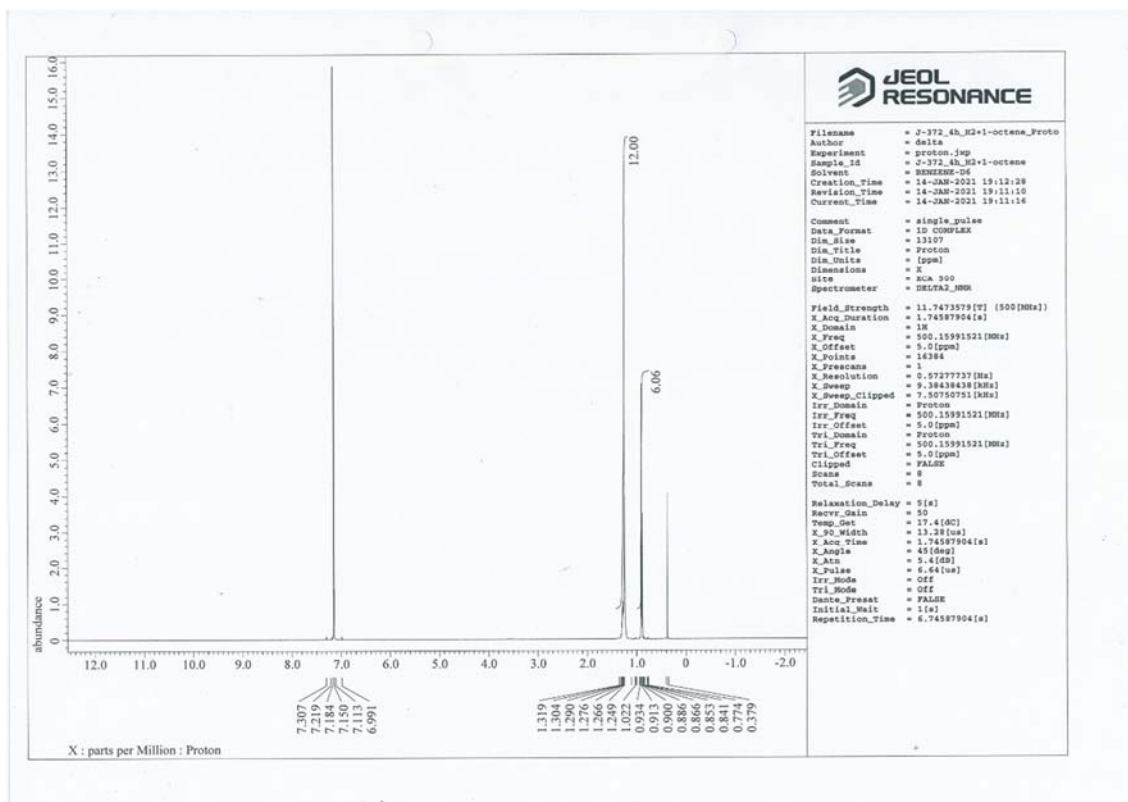

**Figure S10.** <sup>1</sup>H NMR charts of the reaction solutions after (A) 30 mins, (B) 1 hour, (C) 2 hours, (D) 3 hours and (E) 4 hours for the hydrogenation of 1-octene in the presence of PdNPs@MIL-101([Pd] 0.04 mol%). The peaks corresponding to the alkene protons of 1-octene and 2-octene were marked with orange and blue circles, respectively.

SUPPLEMENTARY INFORMATION

(A)

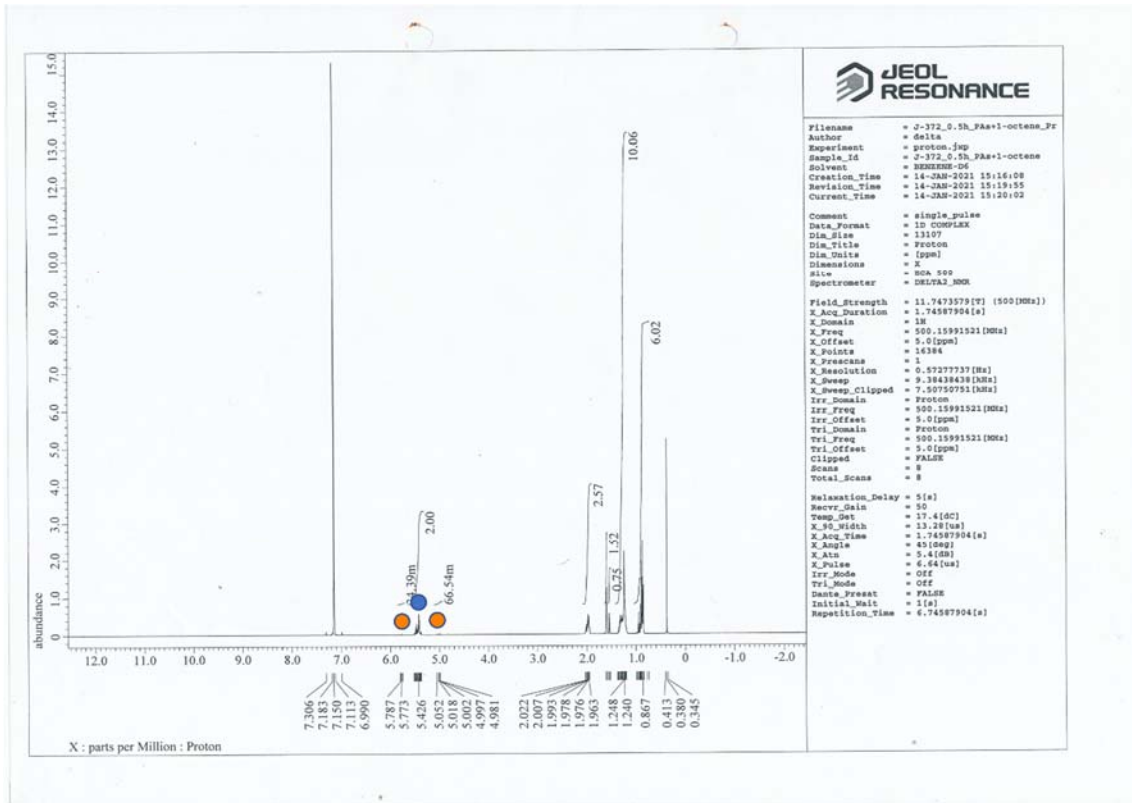

(B)

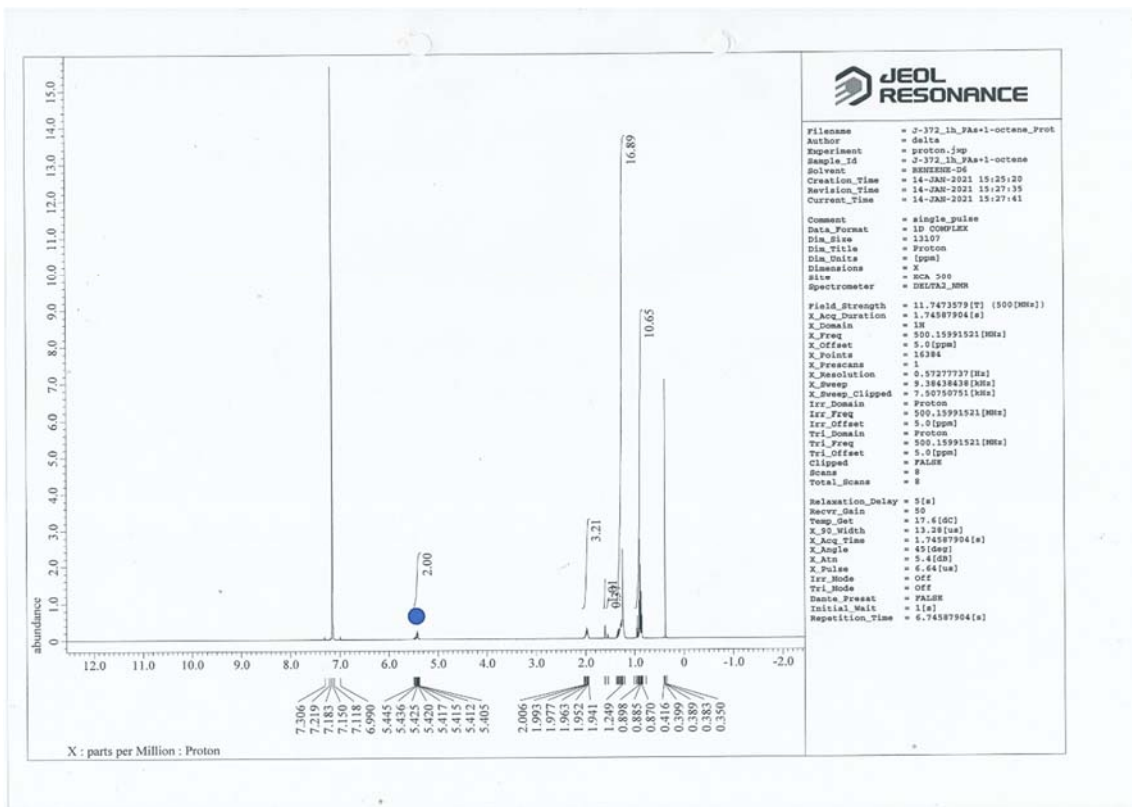

SUPPLEMENTARY INFORMATION

(C)

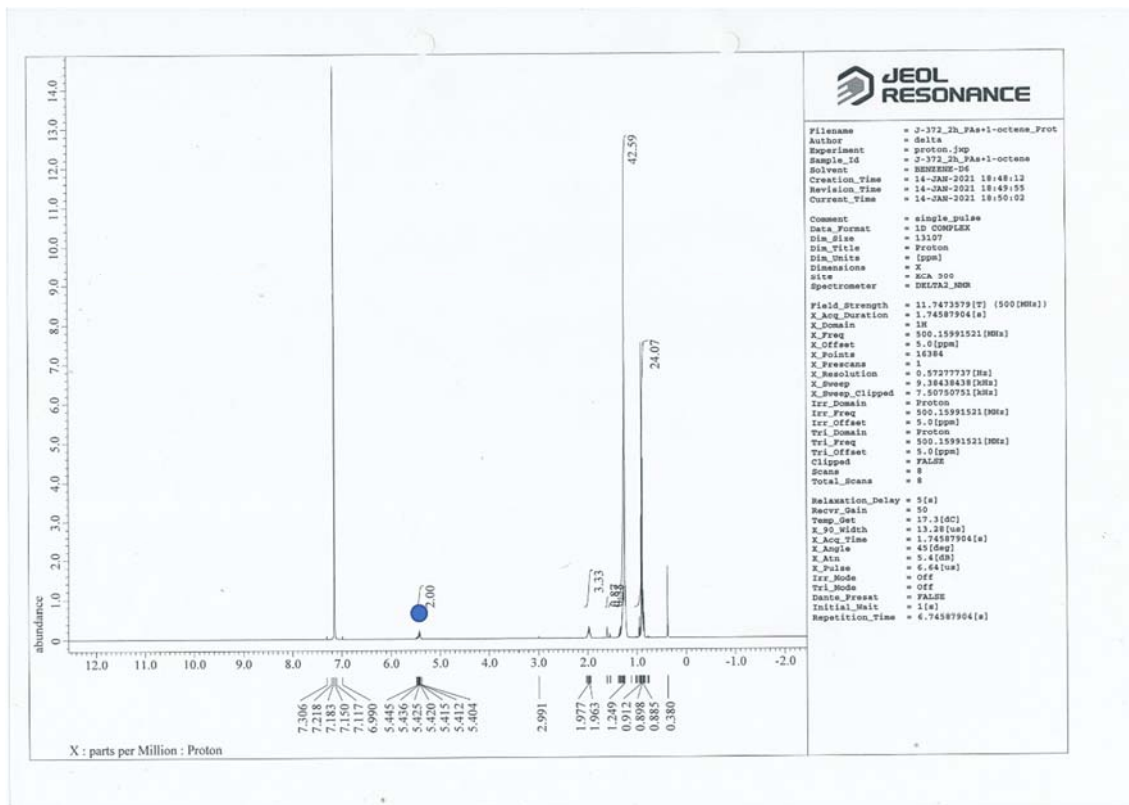

(D)

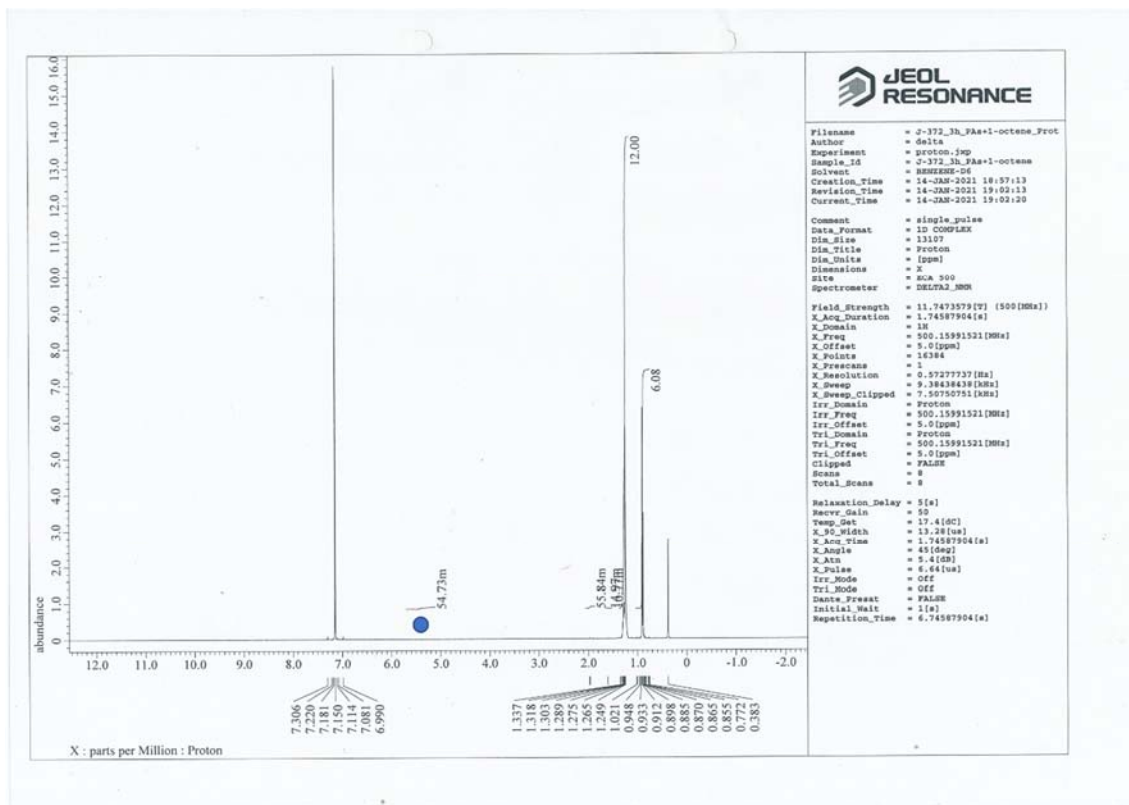

SUPPLEMENTARY INFORMATION

(E)

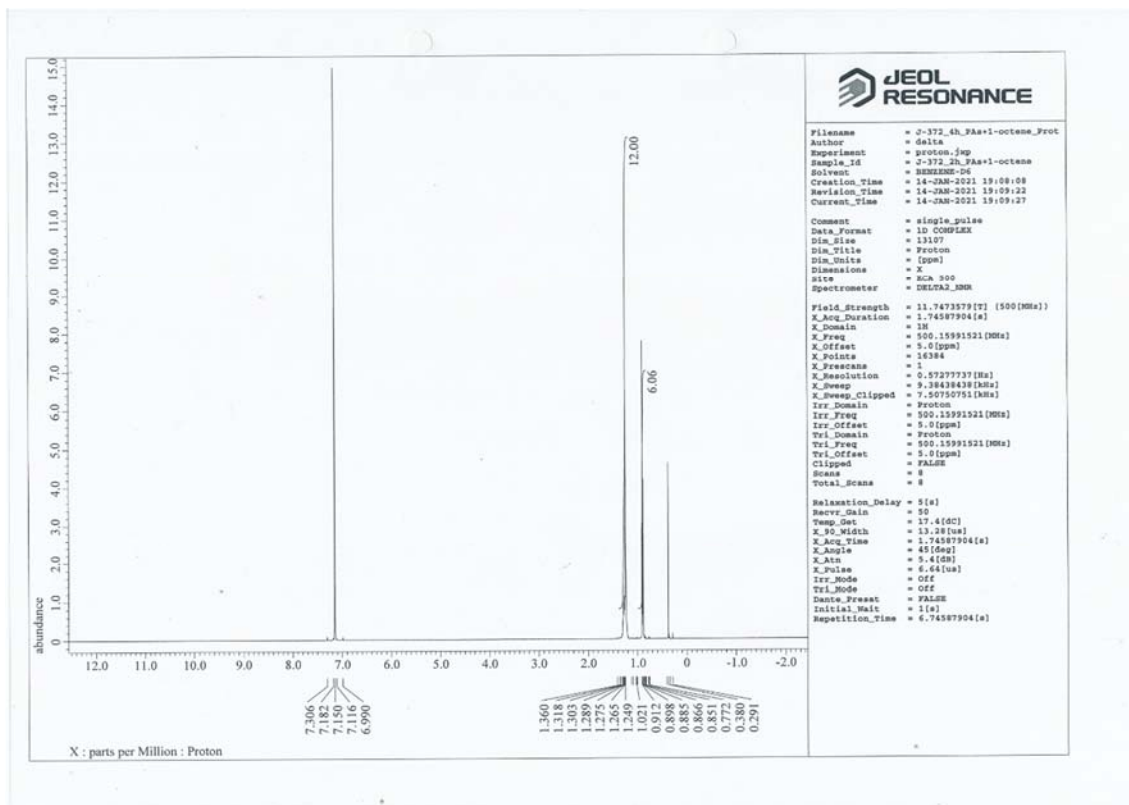

**Figure S11.** <sup>1</sup>H NMR charts of the reaction solutions after (A) 30 mins, (B) 1 hour, (C) 2 hours, (D) 3 hours and (E) 4 hours for the hydrogenation of 1-octene in the presence of PdNPs/PAs@MIL-101(24, 480) ([Pd] 0.04 mol%). The peaks corresponding to the alkene protons of 1-octene and 2-octene were marked with orange and blue circles, respectively.

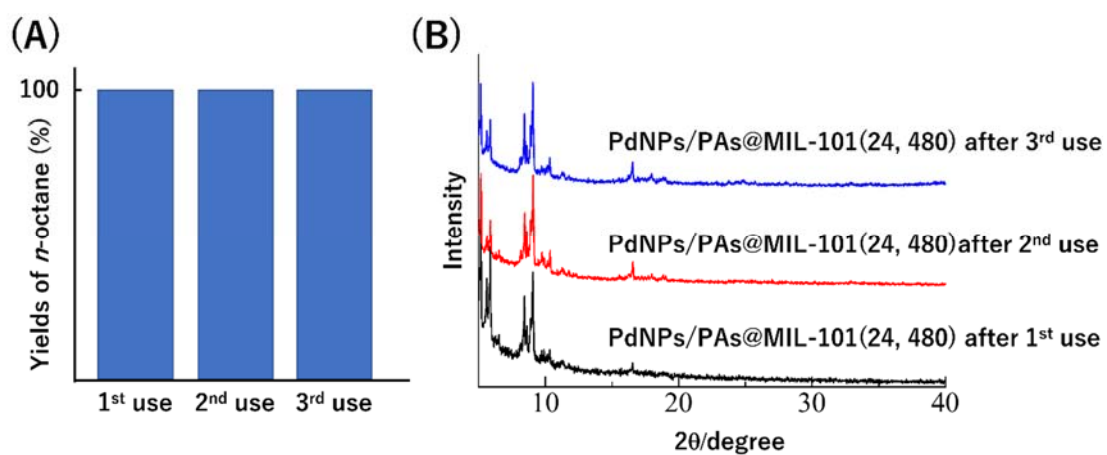

**Figure S12.** (A) Recycling of PdNPs/PAs@MIL-101(24, 480) in the hydrogenation reaction of 1-octene. (B) XRD patterns of PdNPs/PAs@MIL-101(24, 480) after recycling.

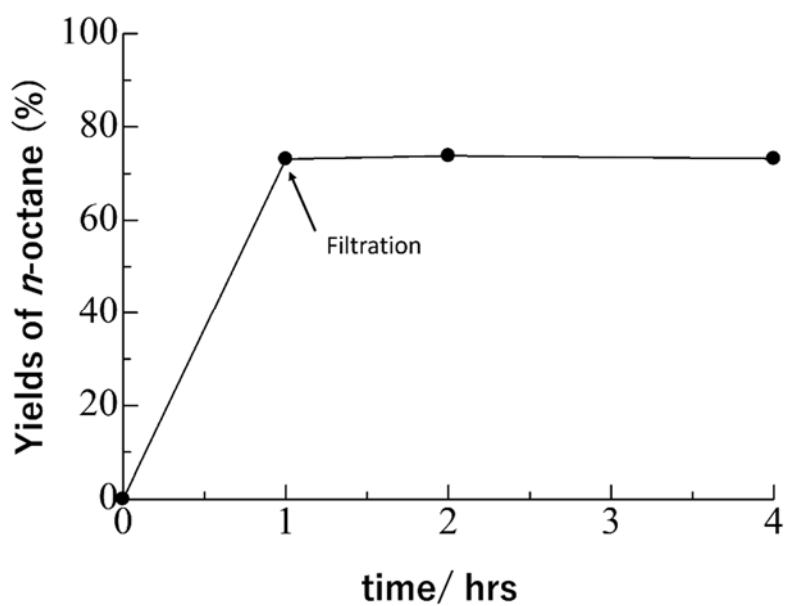

**Figure S13.** Filtration test in the hydration reaction with 1-octene with PdNPs/PAs@MIL-101(24, 480).

SUPPLEMENTARY INFORMATION

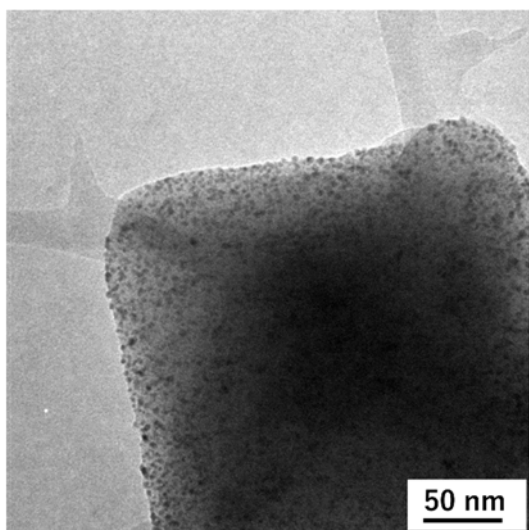

**Figure S14.** TEM image of PdNPs/PAs@MIL-101(24, 480) after use as catalyst.
